# Supplementary material
Source: PubMed Central journal article supplement (PMC3516605)
Supplement: mmc1.pdf [file mmc1.pdf]

American Journal of Human Genetics, *JF*

*A*

## Supplemental Data

### **Mutation in *TECPR2* Reveals a Role for Autophagy in Hereditary Spastic Paraparesis**

Danit Oz-Levi, Bruria Ben-Zeev, Elizabeth K. Ruzzo, Yuki Hitomi, Amir Gelman, Kimberly Pelak, Yair Anikster, Haike Reznik-Wolf, Ifat Bar-Joseph, Tsviya Olender, Anna Alkelai, Meira Weiss, Edna Ben-Asher, Dongliang Ge, Kevin V. Shianna, Zvulun Elazar, David B. Goldstein, Elon Pras, and Doron Lancet

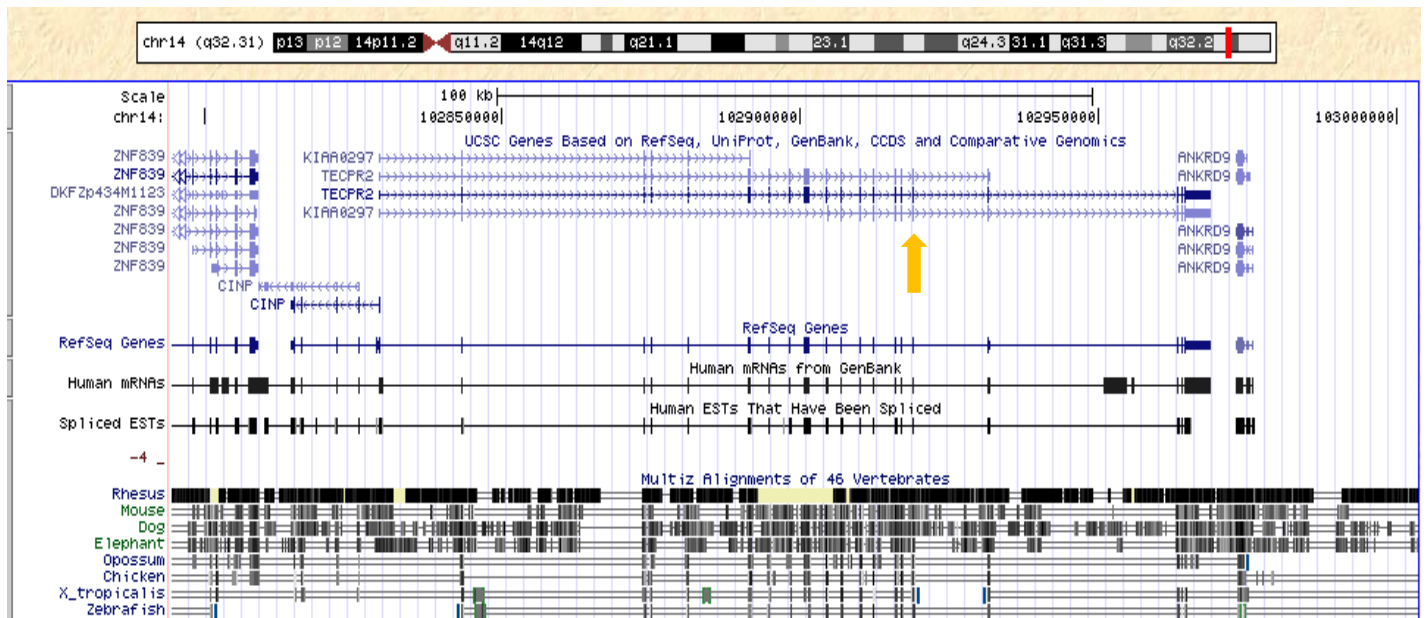

**Figure S1. Location and Conservation of the Deletion in *TECPR2***

Adapted from the UCSC Genome Browser (GRCh37/hg19). The region shown is chr14: 211,818,201-211,081,201 which encompasses *TECPR2* (transcript uc001ylw.1 [ENST00000359520]). The frameshift mutation is located in exon 16 (orange arrow), highly conserved among vertebrates (multiz alignment of 46 vertebrates). The protein is encoded on the plus DNA strand, thus the 5' end and the N-terminus are displayed on the left.

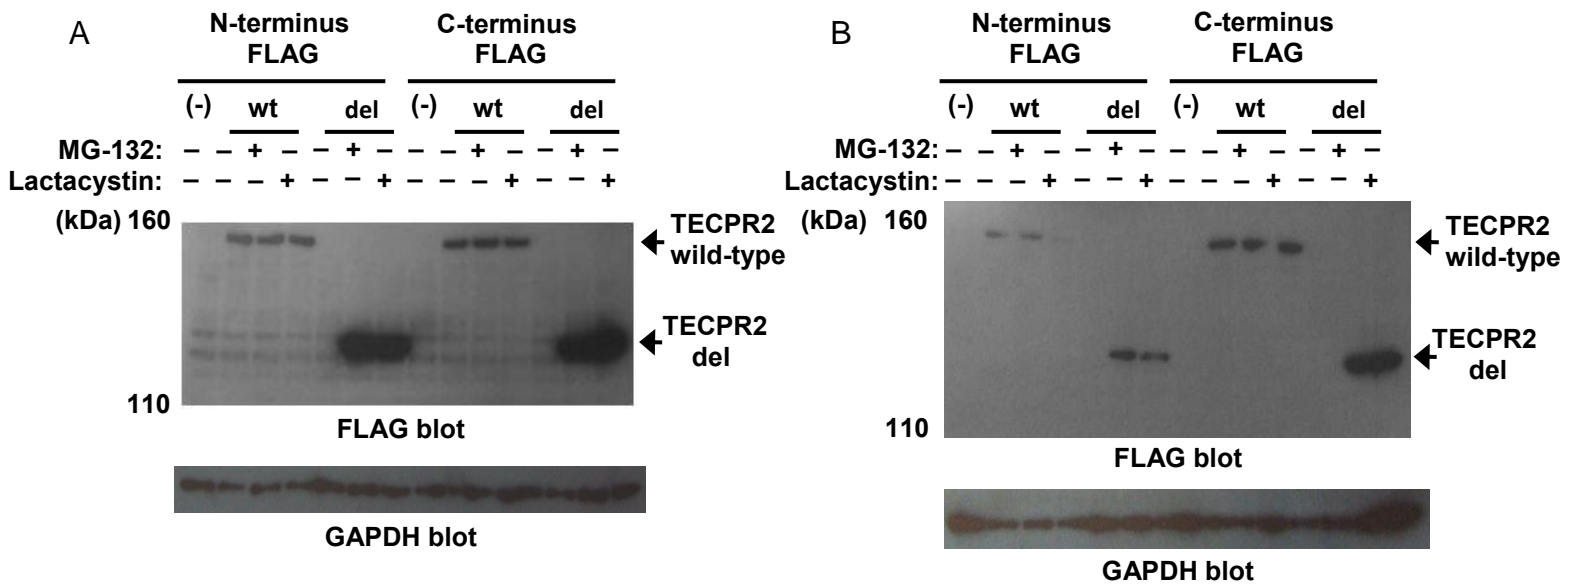

**Figure S2. Effect of FLAG-Tagged TECPR2 on the Mutation**

Expressions of each alleles of N-terminus or C-terminus FLAG tagged TECPR2 and their effects of proteasome inhibition with MG132 and Lactacystin. (A) Immunoblotting with anti-FLAG monoclonal antibody for HEK293 transfectants of N-terminus or C-terminus FLAG tagged TECPR2. (-), empty vector; GAPDH, loading control. (B) Immunoblotting with anti-FLAG monoclonal antibody for HeLa transfectants of N-terminus or C-terminus FLAG tagged TECPR2. Data supports the results in Figure 3D,E with the same notations.

*Plasmid preparation:* First half and second half of cDNAs encoding human TECPR2 were amplified from the human kidney cell line HEK-293 with RNeasy plus (QIAGEN, Santa Clarita, CA), High Capacity cDNA Reverse Transcription Kit (Applied Biosystems, Foster city, CA), PfuUltra II Fusion HS DNA Polymerase (Agilent Technologies, Palo Alto, CA), with primer sets shown in Table S3. cDNAs were subcloned into the pCR-Blunt II-TOPO vector (Invitrogen-Life Technologies, Carlsbad, CA, USA) and subjected to sequence analysis. Using pCR-Blunt II-TECPR2-2nd-3416T, 3416delT of TECPR2 was made by PCR-directed mutagenesis using Phusion HF DNA polymerase and specific T4-phosphorylated primer set, and amplicon was self-ligated using T4 DNA ligase (Promega, Madison, WI), and subjected to sequence analysis. Using pCR-blunt II-TECPR2-1st, N-terminus FLAG was made by two-step PCR-directed mutagenesis using Phusion HF DNA polymerase and specific T4-phosphorylated primer sets, self-ligated using T4 DNA ligase, and subjected to sequence analysis. Using pCR-Blunt II-TECPR2-2nd-3416T or pCR-Blunt II-TECPR2-2nd-3416delT, C-terminus FLAG was made by the same way. cDNA encoding 1st half of human TECPR2 which was subcloned into pCR-blunt II vectors that included the second half of TECPR2, using the Sal I sites from pCR-blunt II vectors which include first half of TECPR2. cDNAs encoding full length N-terminus or C-terminus FLAG-tagged human TECPR2 which contain each of the alleles were subcloned into pcDNA3.1(+) vector (Invitrogen-Life Technologies) using the KpnI and XhoI sites and subjected to sequence analysis.

*Inhibiting the proteasome pathway:* Empty pcDNA3.1 (+) vector, pcDNA3.1(+)-TECPR2-3416T-N-FLAG, pcDNA3.1(+)-TECPR2-3416delT-N-FLAG, pcDNA3.1(+)-TECPR2-3416T-C-FLAG or pcDNA3.1(+)-TECPR2-3416delT-C-FLAG were transfected into monkey kidney cell line COS-7, human kidney cell line HEK-293 and human epithelial cell line HeLa by lipofection using Lipofectamine 2000 (Invitrogen-Life Technologies). After 32h, transfectants were incubated with

20 $\mu$ M of MG132 (Sigma Aldrich) and 20 $\mu$ M of Lactacystin (Sigma Aldrich). After 48h of transfection, the cells were lysed with Nupage LDS sample buffer (Invitrogen) with DL-Dithiothreitol (Sigma Aldrich) and the lysates were subjected to SDS-PAGE gel and transferred to a polyvinylidene difluoride membrane (Millipore, Billerica, MA).

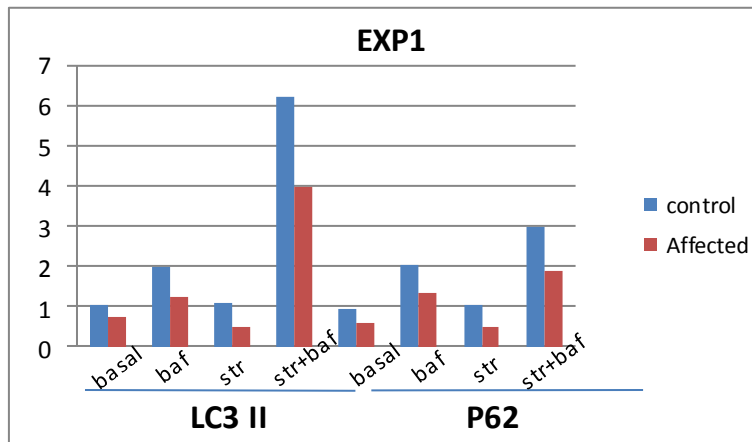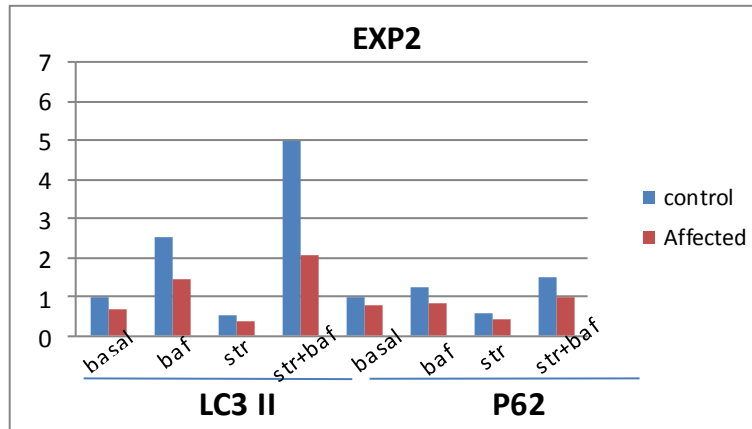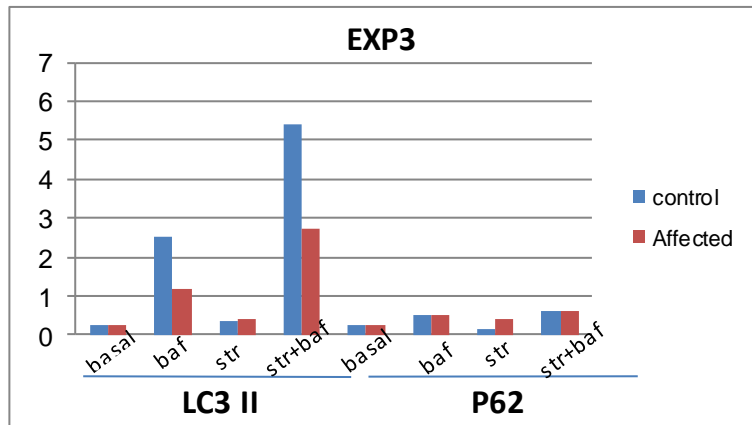

**Figure S3. Effect of Mutation on Autophagy Markers in Skin Fibroblasts**

Full data supporting the results of the three biological replicates in Figure 4B with the same notations, using immunoblot scan quantitation and normalization by GAPDH (Exp1 and 2) or Actin (Exp 3) control.

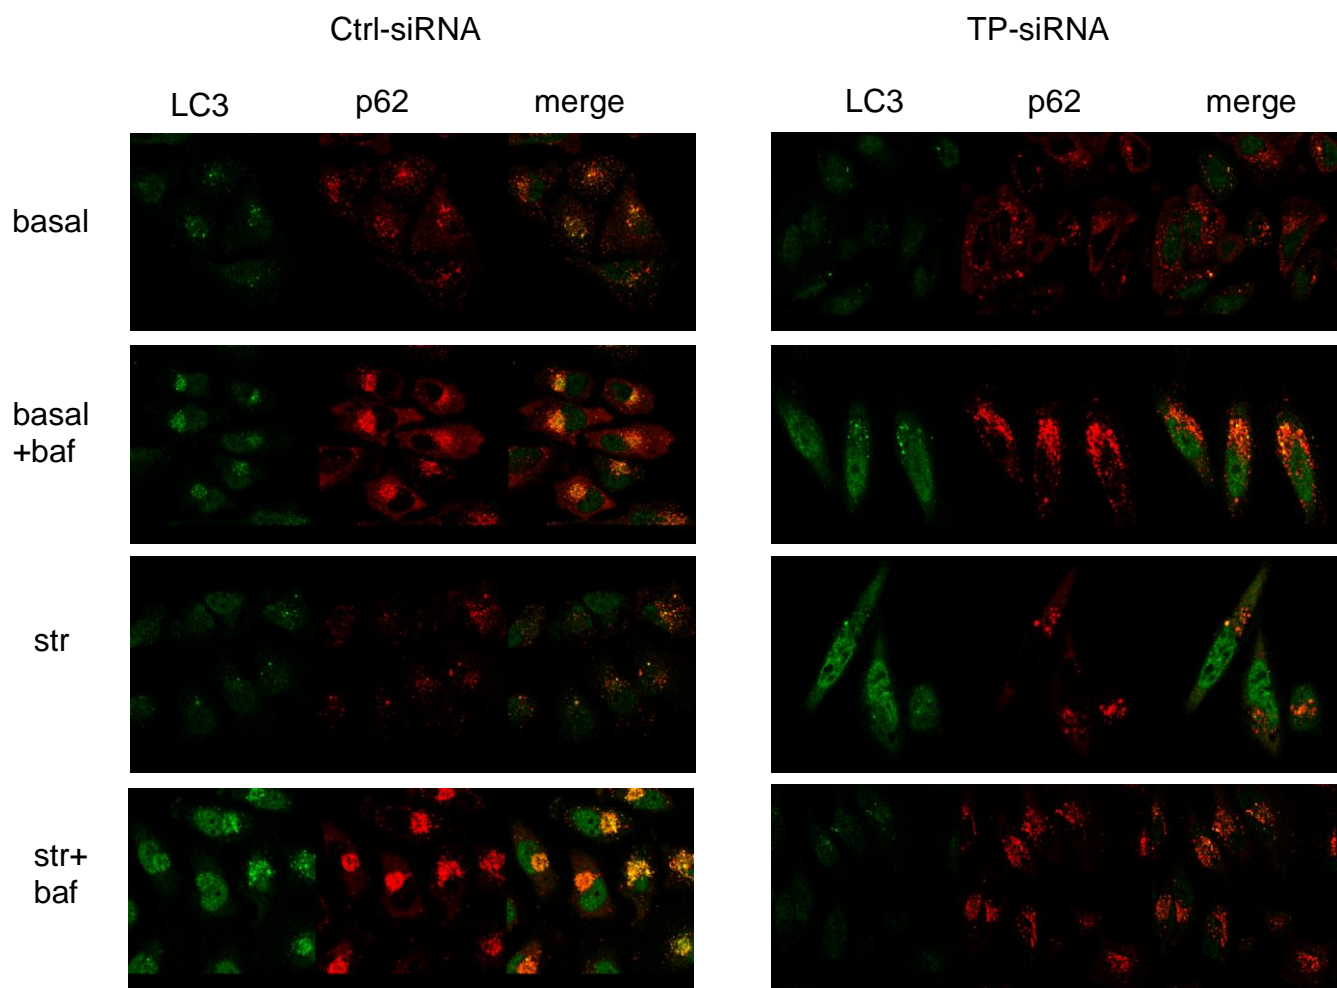

**Figure S4. Confocal Immunofluorescence Assays in HeLa Cells**

Full data supporting the results in Figure 5C and D with the same notations.

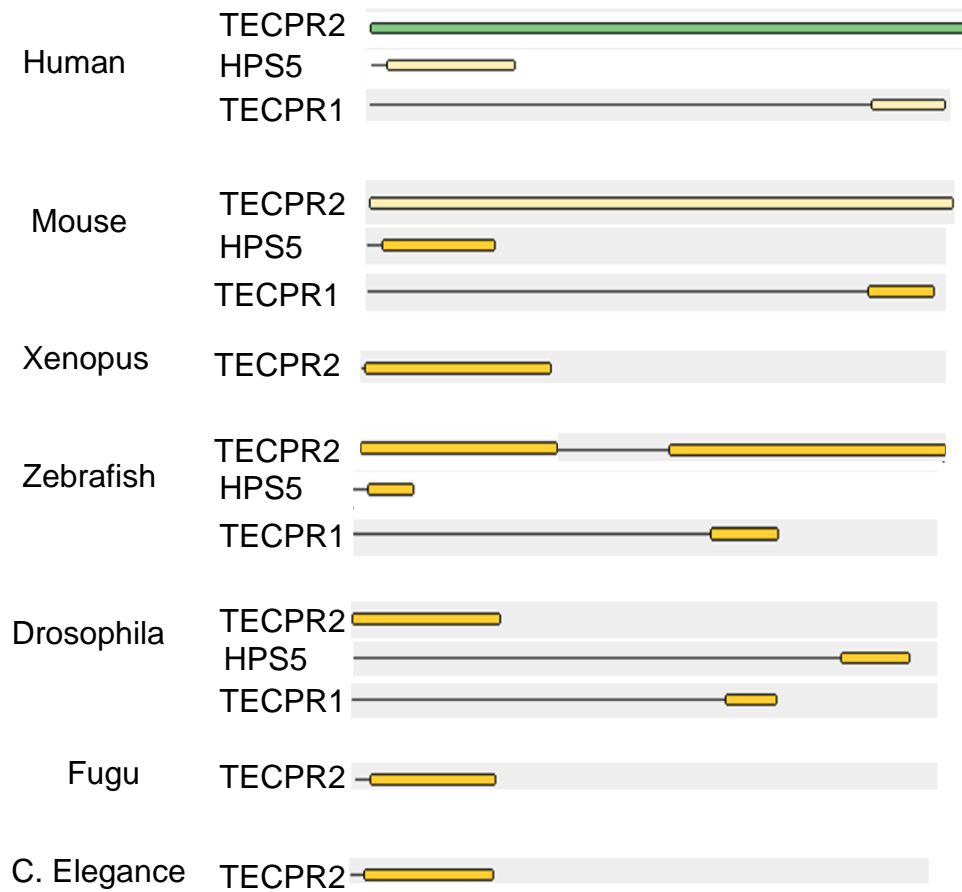

**Figure S5. Similarity Search of the TECPR2 Protein**

Paralogs and Orthologs of TECPR2. Similarity searches by PairsDB show sequence similarity regions in color. Shown are two different paralogs as well as orthologs in several species.

**Table S1. Known Loci and Genes for Hereditary Spastic Paraparesis**

| Locus | Gene                             | Chromosome | Inheritance | Form                       | Other Names                | Reference |
|-------|----------------------------------|------------|-------------|----------------------------|----------------------------|-----------|
| SPG1  | <i>L1CAM</i>                     | X          | X-linked    | Complicated                | MASA                       | 1         |
| SPG2  | <i>PLP1</i>                      | X          | X-linked    | Pure                       |                            | 2         |
| SPG3  | <i>ATL1</i>                      | 14         | Dominant    | complicated                | Strumpell-Lorrain syndrome | 3         |
| SPG4  | <i>SPAST</i>                     | 2          | Dominant    | Pure                       |                            | 4         |
| SPG5  | <i>CYP7B1</i>                    | 8          | Recessive   | Pure                       |                            | 5         |
| SPG6  | <i>NIPA1</i>                     | 15         | Dominant    | Pure                       |                            | 6         |
| SPG7  | <i>SPG7</i>                      | 16         | Recessive   | Complicated                |                            | 7         |
| SPG8  | <i>KIAA0196</i>                  | 8          | Dominant    | Pure                       |                            | 8         |
| SPG9  |                                  | 10         | Dominant    | Complicated                |                            | 9         |
| SPG10 | <i>KIF5A</i>                     | 12         | Dominant    | Pure                       |                            | 10        |
| SPG11 | <i>SPG11</i>                     | 15         | Recessive   | Complicated                |                            | 11        |
| SPG12 | <i>RTN2</i>                      | 19         | Dominant    | Pure                       |                            | 12        |
| SPG13 | <i>HSPD1</i>                     | 2          | Dominant    | Pure                       |                            | 13        |
| SPG14 |                                  | 3          | Recessive   | Complicated                |                            | 14        |
| SPG15 | <i>ZFYVE26</i>                   | 14         | Recessive   | Complicated                |                            | 15        |
| SPG16 |                                  | X          | X-linked    | Complicated                |                            | 16        |
| SPG17 | <i>BSCL2</i>                     | 11         | Dominant    | Pure                       | Silver Syndrome            | 17        |
| SPG18 | <i>ERLIN2</i>                    | 8          | Recessive   | Complicated                |                            | 18        |
| SPG19 |                                  | 9          | Dominant    | Pure                       |                            | 19        |
| SPG20 | <i>SPG20</i><br>(spartin)        | 13         | Recessive   | Complicated                | Troyer Syndrome            | 20        |
| SPG21 | <i>SPG21</i>                     | 15         | Recessive   | Complicated                | Mast Syndrome              | 21        |
| SPG22 |                                  | X          | X-linked    | Complicated                | Allan-Herndon Syndrome     | 22        |
| SPG23 | <i>SPG23</i>                     | 1          | Recessive   | Complicated                | Vitiligo Spasticity        | 23        |
| SPG24 |                                  | 13         | Recessive   | Pure                       |                            | 24        |
| SPG25 |                                  | 6          | Recessive   | Complicated                |                            | 25        |
| SPG26 |                                  | 12         | Recessive   | Complicated                |                            | 26        |
| SPG27 |                                  | 10         | Recessive   | Pure                       |                            | 27        |
| SPG28 |                                  | 14         | Recessive   | Pure                       |                            | 28        |
| SPG29 |                                  | 1          | Dominant    | Complicated                |                            | 29        |
| SPG30 | <i>KIF1A</i> and<br><i>SPG30</i> | 2          | Recessive   | SPG30- Comp<br>KIF1A- Pure |                            | 30        |
| SPG31 | <i>REEP1</i>                     | 2          | Dominant    | Pure                       |                            | 31        |
| SPG32 |                                  | 14         | Recessive   | Complicated                |                            | 32        |
| SPG33 | <i>ZFYVE27</i>                   | 10         | Dominant    | Pure                       |                            | 33        |
| SPG34 |                                  | X          | X-linked    | Pure                       |                            | 34        |
| SPG35 | <i>FA2H</i>                      | 16         | Recessive   | Complicated                |                            | 35        |



|       |                 |    |           |             |                   |    |
|-------|-----------------|----|-----------|-------------|-------------------|----|
| SPG36 |                 | 12 | Dominant  | Complicated |                   | 36 |
| SPG37 |                 | 8  | Dominant  | Pure        |                   | 37 |
| SPG38 |                 | 4  | Dominant  | Complicated | Similar to Silver | 38 |
| SPG39 | <i>PNPLA6</i>   | 19 | Recessive | Complicated |                   | 39 |
| SPG40 |                 | 14 | Dominant  | Pure        |                   | 40 |
| SPG41 |                 | 11 | Dominant  | Pure        |                   | 41 |
| SPG42 | <i>SLC33A1</i>  | 3  | Dominant  | Pure        |                   | 42 |
| SPG43 |                 | 19 | Recessive | Complicated |                   | 43 |
| SPG44 | <i>GJC2</i>     | 1  | Recessive | Complicated |                   | 44 |
| SPG45 |                 | 10 | Recessive | Complicated |                   | 45 |
| SPG46 |                 | 9  | Recessive | Complicated |                   | 46 |
| SPG47 |                 | 1  | Recessive | Complicated |                   | 47 |
| SPG48 | <i>KIAA0415</i> | 7  | Recessive | Complicated |                   | 48 |
| SPG49 | <i>TECPR2</i>   | 14 | Recessive | Complicated |                   |    |

48 different types of Hereditary Spastic Paraparesis in several mode of inheritance for which 27 genes have been identified. The presently reported disease is proposed to be SPG49.

**Table S2. Sequence Variants Identified in Exome Sequencing of Four Affected Individuals with SPG49**

| <b>Filter</b>                                                          | <b>Variants</b> |
|------------------------------------------------------------------------|-----------------|
| <b>Total shared variants</b>                                           | 3413            |
| <b>Total shared homozygous variants</b>                                | 426             |
| <b>Total Functional (Nonsynonymous, Stop, Frameshift, Splice site)</b> | 93              |
| <b>Absent in dbSNP132 and 1000 genomes</b>                             | 8               |
| <b>Absent in 909 exome/genome sequenced in- house controls</b>         | 1               |

**Table S3. Primers Used in This Study****(A) Genotyping Primers**

| <b>Primer Name</b>        | <b>Primer Sense</b> | <b>Primer Sequence (5' – 3')</b> |
|---------------------------|---------------------|----------------------------------|
| 3416delT (1,098 controls) | <b>Forward</b>      | CATGACCCCTTTCTGCAGGAA            |
|                           | <b>Reverse</b>      | GCTGCACAGGTCCTTGCT               |
|                           | <b>Probe</b>        | CGAAGG[A/-]CACCGACAC             |
| 3416delT (150 controls)   | <b>Forward</b>      | CGTCTGCTGAAAGGC AAAG             |
|                           | <b>Reverse</b>      | CACAGGTCCTTGCTGCTC T             |
|                           |                     |                                  |

**(B) Plasmids Primers**

| <b>Primer Name</b>                       | <b>Primer Sense</b> | <b>Primer Sequence (5' – 3')</b> |
|------------------------------------------|---------------------|----------------------------------|
| cDNA-first half                          | <b>Forward</b>      | CCAGGTTTCCTAGATGACA              |
|                                          | <b>Reverse</b>      | TGCAAGTATAGGTCCCCACT             |
| cDNA-second half                         | <b>Forward</b>      | TTCTGAACGTGTCTTGGGGA             |
|                                          | <b>Reverse</b>      | TCTGGACAAGTGTTGAGGCA             |
| 3416delT mutagenesis                     | <b>Forward</b>      | GTGGCTGTGCCAGAGCA                |
|                                          | <b>Reverse</b>      | GGAAGCTTCCTTCCTTCGT              |
| C-terminus FLAG tag for 3416T-first step | <b>Forward</b>      | GACAAGTGAAGGAGCCCTGGCCGAGT       |
|                                          | <b>Reverse</b>      | GTAGTCGATGACCTCCCACTCGTCCT       |
| C-terminus                               | <b>Forward</b>      | GACGATGACAAGTGAAGGAGCCCTGG       |

|                                           |                |                                   |
|-------------------------------------------|----------------|-----------------------------------|
| FLAG tag for<br>3416T-second<br>step      | <b>Reverse</b> | GTCCTTGTAGTCGATGACCTCCCACT        |
| C-terminus                                | <b>Forward</b> | GACAAGTAGGAGCTGTAAAATTGACA        |
| FLAG tag for<br>3416delT -first<br>step   | <b>Reverse</b> | GTAGTCGCTGGGAGAGGTCCAGCCTG        |
| C-terminus                                | <b>Forward</b> | GACGATGACAAGTAGGAGCTGTAAA         |
| FLAG tag for<br>3416delT -<br>second step | <b>Reverse</b> | GTCCTTGTAGTCGCTGGGAGAGGTCC        |
| N-terminus                                | <b>Forward</b> | GACAAGATGGCATCGATATCCGCGCCTGTTACA |
| FLAG tag first<br>step                    | <b>Reverse</b> | GTAGTCCATGGCCAAGGTTTCCACAGAC      |
| N-terminus                                | <b>Forward</b> | GACGATGACAAG ATGGCATCGATATCAGAG   |
| FLAG tag<br>second step                   | <b>Reverse</b> | GTCCTTGTAGTC CATGGCCAAGGTTTC      |

**(C) Semi-quantitative RT-PCR Primers**

| <b>Primer Name</b> | <b>Primer Sense</b> | <b>Primer Sequence (5' – 3')</b> |
|--------------------|---------------------|----------------------------------|
| TECPR2-RT-PCR      | <b>Forward</b>      | GCCCTTCTCTGGAAGATTGA             |
|                    | <b>Reverse</b>      | TGCAAGTATAGGTCCCCACT             |

**(D) Quantitative Real-Time PCR Primers**

| <b>Primer Name</b> | <b>Primer Sense</b> | <b>Primer Sequence (5' – 3')</b> |
|--------------------|---------------------|----------------------------------|
| TECPR2-EX 16-17    | <b>Forward</b>      | CAGCTAGGAGCTGTAAAATTGACAAG       |
|                    | <b>Reverse</b>      | CGGAAGTAAACTCCACCCCTG            |

## References

1. Jouet, M., Rosenthal, A., Armstrong, G., MacFarlane, J., Stevenson, R., Paterson, J., Metzenberg, A., Ionasescu, V., Temple, K., and Kenwrick, S. (1994). X-linked spastic paraplegia (SPG1), MASA syndrome and X-linked hydrocephalus result from mutations in the L1 gene. *Nat Genet* 7, 402-407.
2. Lee, E.S., Moon, H.K., Park, Y.H., Garbern, J., and Hobson, G.M. (2004). A case of complicated spastic paraplegia 2 due to a point mutation in the proteolipid protein 1 gene. *J Neurol Sci* 224, 83-87.
3. Durr, A., Camuzat, A., Colin, E., Tallaksen, C., Hannequin, D., Coutinho, P., Fontaine, B., Rossi, A., Gil, R., Rousselle, C., et al. (2004). *Atlastin1* mutations are frequent in young-onset autosomal dominant spastic paraplegia. *Arch Neurol* 61, 1867-1872.
4. Hazan, J., Fonknechten, N., Mavel, D., Paternotte, C., Samson, D., Artiguenave, F., Davoine, C.S., Cruaud, C., Durr, A., Wincker, P., et al. (1999). Spastin, a new AAA protein, is altered in the most frequent form of autosomal dominant spastic paraplegia. *Nat Genet* 23, 296-303.
5. Goizet, C., Boukhris, A., Durr, A., Beetz, C., Truchetto, J., Tesson, C., Tsaousidou, M., Forlani, S., Guyant-Marechal, L., Fontaine, B., et al. (2009). *CYP7B1* mutations in pure and complex forms of hereditary spastic paraplegia type 5. *Brain* 132, 1589-1600.
6. Rainier, S., Chai, J.H., Tokarz, D., Nicholls, R.D., and Fink, J.K. (2003). *NIPA1* gene mutations cause autosomal dominant hereditary spastic paraplegia (SPG6). *Am J Hum Genet* 73, 967-971.
7. De Michele, G., De Fusco, M., Cavalcanti, F., Filla, A., Marconi, R., Volpe, G., Monticelli, A., Ballabio, A., Casari, G., and Coccozza, S. (1998). A new locus for autosomal recessive hereditary spastic paraplegia maps to chromosome 16q24.3. *Am J Hum Genet* 63, 135-139.
8. Valdmanis, P.N., Meijer, I.A., Reynolds, A., Lei, A., MacLeod, P., Schlesinger, D., Zatz, M., Reid, E., Dion, P.A., Drapeau, P., et al. (2007). Mutations in the *KIAA0196* gene at the SPG8 locus cause hereditary spastic paraplegia. *Am J Hum Genet* 80, 152-161.
9. Seri, M., Cusano, R., Forabosco, P., Cinti, R., Caroli, F., Picco, P., Bini, R., Morra, V.B., De Michele, G., Lerone, M., et al. (1999). Genetic mapping to 10q23.3-q24.2, in a large Italian pedigree, of a new syndrome showing bilateral cataracts, gastroesophageal reflux, and spastic paraparesis with amyotrophy. *Am J Hum Genet* 64, 586-593.
10. Reid, E., Kloos, M., Ashley-Koch, A., Hughes, L., Bevan, S., Svenson, I.K., Graham, F.L., Gaskell, P.C., Dearlove, A., Pericak-Vance, M.A., et al. (2002). A kinesin heavy chain (*KIF5A*) mutation in hereditary spastic paraplegia (SPG10). *Am J Hum Genet* 71, 1189-1194.
11. Lossos, A., Stevanin, G., Meiner, V., Argov, Z., Bouslam, N., Newman, J.P., Gomori, J.M., Klebe, S., Lerer, I., Elleuch, N., et al. (2006). Hereditary spastic paraplegia with thin corpus callosum: reduction of the SPG11 interval and evidence for further genetic heterogeneity. *Arch Neurol* 63, 756-760.

12. Reid, E., Dearlove, A.M., Osborn, O., Rogers, M.T., and Rubinsztein, D.C. (2000). A locus for autosomal dominant "pure" hereditary spastic paraplegia maps to chromosome 19q13. *Am J Hum Genet* 66, 728-732.
13. Fontaine, B., Davoine, C.S., Durr, A., Paternotte, C., Feki, I., Weissenbach, J., Hazan, J., and Brice, A. (2000). A new locus for autosomal dominant pure spastic paraplegia, on chromosome 2q24-q34. *Am J Hum Genet* 66, 702-707.
14. Vazza, G., Zortea, M., Boaretto, F., Micaglio, G.F., Sartori, V., and Mostacciuolo, M.L. (2000). A new locus for autosomal recessive spastic paraplegia associated with mental retardation and distal motor neuropathy, SPG14, maps to chromosome 3q27-q28. *Am J Hum Genet* 67, 504-509.
15. Hughes, C.A., Byrne, P.C., Webb, S., McMonagle, P., Patterson, V., Hutchinson, M., and Parfrey, N.A. (2001). SPG15, a new locus for autosomal recessive complicated HSP on chromosome 14q. *Neurology* 56, 1230-1233.
16. Steinmuller, R., Lantigua-Cruz, A., Garcia-Garcia, R., Kostrzewa, M., Steinberger, D., and Muller, U. (1997). Evidence of a third locus in X-linked recessive spastic paraplegia. *Hum Genet* 100, 287-289.
17. Patel, H., Hart, P.E., Warner, T.T., Houlston, R.S., Patton, M.A., Jeffery, S., and Crosby, A.H. (2001). The Silver syndrome variant of hereditary spastic paraplegia maps to chromosome 11q12-q14, with evidence for genetic heterogeneity within this subtype. *Am J Hum Genet* 69, 209-215.
18. Yildirim, Y., Orhan, E.K., Iseri, S.A., Serdaroglu-Oflazer, P., Kara, B., Solakoglu, S., and Tolun, A. (2011). A frameshift mutation of ERLIN2 in recessive intellectual disability, motor dysfunction and multiple joint contractures. *Hum Mol Genet* 20, 1886-1892.
19. Valente, E.M., Brancati, F., Caputo, V., Bertini, E., Patrono, C., Costanti, D., and Dallapiccola, B. (2002). Novel locus for autosomal dominant pure hereditary spastic paraplegia (SPG19) maps to chromosome 9q33-q34. *Ann Neurol* 51, 681-685.
20. Patel, H., Cross, H., Proukakis, C., Hershberger, R., Bork, P., Ciccarelli, F.D., Patton, M.A., McKusick, V.A., and Crosby, A.H. (2002). SPG20 is mutated in Troyer syndrome, an hereditary spastic paraplegia. *Nat Genet* 31, 347-348.
21. Simpson, M.A., Cross, H., Proukakis, C., Pryde, A., Hershberger, R., Chatonnet, A., Patton, M.A., and Crosby, A.H. (2003). Maspardin is mutated in mast syndrome, a complicated form of hereditary spastic paraplegia associated with dementia. *Am J Hum Genet* 73, 1147-1156.
22. Frints, S.G., Lenzner, S., Bauters, M., Jensen, L.R., Van Esch, H., des Portes, V., Moog, U., Macville, M.V., van Roozendaal, K., Schrandt-Stumpel, C.T., et al. (2008). MCT8 mutation analysis and identification of the first female with Allan-Herndon-Dudley syndrome due to loss of MCT8 expression. *Eur J Hum Genet* 16, 1029-1037.
23. Blumen, S.C., Bevan, S., Abu-Mouch, S., Negus, D., Kahana, M., Inzelberg, R., Mazarib, A., Mahamid, A., Carasso, R.L., Slor, H., et al. (2003). A locus for complicated hereditary spastic paraplegia maps to chromosome 1q24-q32. *Ann Neurol* 54, 796-803.
24. Hodgkinson, C.A., Bohlega, S., Abu-Amero, S.N., Cupler, E., Kambouris, M., Meyer, B.F., and Bharucha, V.A. (2002). A novel form of autosomal recessive

- pure hereditary spastic paraplegia maps to chromosome 13q14. *Neurology* 59, 1905-1909.
25. Zortea, M., Vettori, A., Trevisan, C.P., Bellini, S., Vazza, G., Armani, M., Simonati, A., and Mostacciuolo, M.L. (2002). Genetic mapping of a susceptibility locus for disc herniation and spastic paraplegia on 6q23.3-q24.1. *J Med Genet* 39, 387-390.
  26. Wilkinson, P.A., Simpson, M.A., Bastaki, L., Patel, H., Reed, J.A., Kalidas, K., Samilchuk, E., Khan, R., Warner, T.T., and Crosby, A.H. (2005). A new locus for autosomal recessive complicated hereditary spastic paraplegia (SPG26) maps to chromosome 12p11.1-12q14. *J Med Genet* 42, 80-82.
  27. Meijer, I.A., Cossette, P., Roussel, J., Benard, M., Toupin, S., and Rouleau, G.A. (2004). A novel locus for pure recessive hereditary spastic paraplegia maps to 10q22.1-10q24.1. *Ann Neurol* 56, 579-582.
  28. Bouslam, N., Benomar, A., Azzedine, H., Bouhouche, A., Namekawa, M., Klebe, S., Charon, C., Durr, A., Ruberg, M., Brice, A., et al. (2005). Mapping of a new form of pure autosomal recessive spastic paraplegia (SPG28). *Ann Neurol* 57, 567-571.
  29. Orlacchio, A., Kawarai, T., Gaudiello, F., St George-Hyslop, P.H., Floris, R., and Bernardi, G. (2005). New locus for hereditary spastic paraplegia maps to chromosome 1p31.1-1p21.1. *Ann Neurol* 58, 423-429.
  30. Klebe, S., Azzedine, H., Durr, A., Bastien, P., Bouslam, N., Elleuch, N., Forlani, S., Charon, C., Koenig, M., Melki, J., et al. (2006). Autosomal recessive spastic paraplegia (SPG30) with mild ataxia and sensory neuropathy maps to chromosome 2q37.3. *Brain* 129, 1456-1462.
  31. Zuchner, S., Kail, M.E., Nance, M.A., Gaskell, P.C., Svenson, I.K., Marchuk, D.A., Pericak-Vance, M.A., and Ashley-Koch, A.E. (2006). A new locus for dominant hereditary spastic paraplegia maps to chromosome 2p12. *Neurogenetics* 7, 127-129.
  32. Stevanin, G., Paternotte, C., Coutinho, P., Klebe, S., Elleuch, N., Loureiro, J.L., Denis, E., Cruz, V.T., Durr, A., Prud'homme, J.F., et al. (2007). A new locus for autosomal recessive spastic paraplegia (SPG32) on chromosome 14q12-q21. *Neurology* 68, 1837-1840.
  33. Mannan, A.U., Krawen, P., Sauter, S.M., Boehm, J., Chronowska, A., Paulus, W., Neesen, J., and Engel, W. (2006). ZFYVE27 (SPG33), a novel spastin-binding protein, is mutated in hereditary spastic paraplegia. *Am J Hum Genet* 79, 351-357.
  34. Macedo-Souza, L.I., Kok, F., Santos, S., Licinio, L., Lezirovitz, K., Nascimento, R.M., Bueno, C., Martyn, M., Leao, E.K., and Zatz, M. (2008). Reevaluation of a large family defines a new locus for X-linked recessive pure spastic paraplegia (SPG34) on chromosome Xq25. *Neurogenetics* 9, 225-226.
  35. Dick, K.J., Eckhardt, M., Paisan-Ruiz, C., Alshehhi, A.A., Proukakis, C., Sibtain, N.A., Maier, H., Sharifi, R., Patton, M.A., Bashir, W., et al. (2010). Mutation of FA2H underlies a complicated form of hereditary spastic paraplegia (SPG35). *Hum Mutat* 31, E1251-1260.
  36. Schule, R., Bonin, M., Durr, A., Forlani, S., Sperfeld, A.D., Klimpe, S., Mueller, J.C., Seibel, A., van de Warrenburg, B.P., Bauer, P., et al. (2009). Autosomal



- dominant spastic paraplegia with peripheral neuropathy maps to chr12q23-24. *Neurology* 72, 1893-1898.
37. Hanein, S., Durr, A., Ribai, P., Forlani, S., Leutenegger, A.L., Nelson, I., Babron, M.C., Elleuch, N., Depienne, C., Charon, C., et al. (2007). A novel locus for autosomal dominant "uncomplicated" hereditary spastic paraplegia maps to chromosome 8p21.1-q13.3. *Hum Genet* 122, 261-273.
  38. Orlacchio, A., Patrono, C., Gaudiello, F., Rocchi, C., Moschella, V., Floris, R., Bernardi, G., and Kawarai, T. (2008). Silver syndrome variant of hereditary spastic paraplegia: A locus to 4p and allelism with SPG4. *Neurology* 70, 1959-1966.
  39. Rainier, S., Bui, M., Mark, E., Thomas, D., Tokarz, D., Ming, L., Delaney, C., Richardson, R.J., Albers, J.W., Matsunami, N., et al. (2008). Neuropathy target esterase gene mutations cause motor neuron disease. *Am J Hum Genet* 82, 780-785.
  40. Subramony, S.H., Nguyen, T.V., Langford, L., Lin, X., Parent, A.D., and Zhang, J. (2009). Identification of a new form of autosomal dominant spastic paraplegia. *Clin Genet* 76, 113-116.
  41. Zhao, G.H., Hu, Z.M., Shen, L., Jiang, H., Ren, Z.J., Liu, X.M., Xia, K., Guo, P., Pan, Q., and Tang, B.S. (2008). A novel candidate locus on chromosome 11p14.1-p11.2 for autosomal dominant hereditary spastic paraplegia. *Chin Med J (Engl)* 121, 430-434.
  42. Lee, E., and Leung, C.M. (2008). Clinical predictors of psychiatric and medical morbidities of charcoal-burning suicide attempt in Hong Kong. *Gen Hosp Psychiatry* 30, 561-563.
  43. Meilleur, K.G., Traore, M., Sangare, M., Britton, A., Landoure, G., Coulibaly, S., Niare, B., Mochel, F., La Pean, A., Rafferty, I., et al. (2010). Hereditary spastic paraplegia and amyotrophy associated with a novel locus on chromosome 19. *Neurogenetics* 11, 313-318.
  44. Orthmann-Murphy, J.L., Salsano, E., Abrams, C.K., Bizzi, A., Uziel, G., Freidin, M.M., Lamantea, E., Zeviani, M., Scherer, S.S., and Pareyson, D. (2009). Hereditary spastic paraplegia is a novel phenotype for GJA12/GJC2 mutations. *Brain* 132, 426-438.
  45. Dursun, U., Koroglu, C., Kocasoy Orhan, E., Ugur, S.A., and Tolun, A. (2009). Autosomal recessive spastic paraplegia (SPG45) with mental retardation maps to 10q24.3-q25.1. *Neurogenetics* 10, 325-331.
  46. Boukhris, A., Feki, I., Elleuch, N., Miladi, M.I., Boland-Auge, A., Truchetto, J., Mundwiller, E., Jezequel, N., Zelenika, D., Mhiri, C., et al. (2010). A new locus (SPG46) maps to 9p21.2-q21.12 in a Tunisian family with a complicated autosomal recessive hereditary spastic paraplegia with mental impairment and thin corpus callosum. *Neurogenetics* 11, 441-448.
  47. Blumkin, L., Lerman-Sagie, T., Lev, D., Yosovich, K., and Leshinsky-Silver, E. (2011). A new locus (SPG47) maps to 1p13.2-1p12 in an Arabic family with complicated autosomal recessive hereditary spastic paraplegia and thin corpus callosum. *J Neurol Sci* 305, 67-70.
  48. Slabicki, M., Theis, M., Krastev, D.B., Samsonov, S., Mundwiller, E., Junqueira, M., Paszkowski-Rogacz, M., Teyra, J., Heninger, A.K., Poser, I., et al. (2010). A

genome-scale DNA repair RNAi screen identifies SPG48 as a novel gene associated with hereditary spastic paraplegia. PLoS Biol 8, e1000408.
